# Supplementary material for: Dibenzoeilatin: a novel ligand exhibiting remarkable complementary π–π stacking interactions
Source: Royal Society of Chemistry journal article supplement (doi:10.1039/b206058b), 2002-01-01
Supplement: b206058b.doc [file b206058b.doc]

**Supporting Information**

**Experimental Section**

**Materials.** Dibenzoeilatin (**2**) was synthesized according to the literature procedure.1 All other chemicals and solvents used were of reagent grade and used without further purification.

**Instrumentation.** NMR experiments were performed on a Bruker Avance 400 spectrometer, using the residual protons of the solvent (CD3CN) as an internal standard at  = 1.93 ppm. UV/vis absorption spectra in acetonitrile (UV-grade) and in chloroform (UV-grade) were measured with a Kontron UVIKRON 931 UV/vis spectrometer. FABMS were obtained on a VG-AutoSpec M250 mass spectrometer, in a *m*-nitrobenzylalcohol matrix.

**Synthesis. [Ru(bpy)2(dbneil)][PF6]2 (3)** *rac,cis*-[Ru(bpy)2Cl2]2H2O (11.4 mg, 0.022 mmol) and dibenzoeilatin (10.0 mg, 0.022 mmol) were added to 5 mL of ethylene glycol and heated to 140oC for 8 hr under Argon atmosphere. The green reaction mixture obtained was cooled to RT, and a saturated aqueous KPF6 solution was added until precipitation of a green solid occurred. The solid was isolated by centrifugation and washed several times with water to remove traces of salts. The solid was dried *in vacuo*, and then purified by several recrystallizations from CH3CN/ether. The desired complex was obtained as a green solid, in a yield of 57% (14.6 mg). 1H NMR (CD3CN, 296.9 ± 0.1 K, 0.126 mM)  9.203 (d, *J* = 7.7 Hz, 1H, Hd), 9.139 (d, *J* = 8.4 Hz, 1H, Hd’), 8.591 (d, *J* = 8.2 Hz, 1H, Ha’), 8.486 (d, *J* = 8.1 Hz, 1H, H3’), 8.443 (d, *J* = 8.2 Hz, 1H, H3), 8.163 (t, *J* = 8.0 Hz, 1H, Hb’), 8.099 (t, *J* = 7.8 Hz, 1H, H4’), 8.031 (t, *J* = 7.4 Hz, 1H, Hc’), 7.942 (t, *J* = 7.6 Hz, 1H, H4), 7.90 (m, 2H, Ha, Hc), 7.800 (broad d, 1H, H6), 7.46 (m, 3H, Hb, H6’, H5’), 7.169 (t, *J* = 6.0 Hz, 1H, H5). 13C NMR (CD3CN, 323 K)  154.9 (*C*-H6), 152.5 (*C*-H6’), 140.1 (*C*-H4’), 139.6 (*C*-H4), 134.5 (*C*-Hb’), 133.8 (*C*-Ha), 132.7 (*C*-Ha’), 131.7 (*C*-Hc), 130.8 (*C*-Hc’), 130.4 (*C*-Hd), 128.3 (*C*-H5’), 128.3 (*C*-Hd’), 128.0 (*C*-H5), 126.3 (*C*-Hb), 125.9 (*C*-H3’), 125.4 (*C*-H3); UV-vis [max, nm (10-4 M-1cm-1)] 236(4.9), 257(4.6), 286(6.8), 330(3.9), 419(2.1), 441(2.4), 594(1.5); FABMS, 713.0 [M-2PF6-bpy]+, 870.1 [M-2PF6+H]+.

**X-ray Structure Determinations.** The X-ray diffraction measurements were carried out at ca. 115 K on a Nonius Kappa CCD diffractometer, using MoK ( = 0.7107 Å) radiation. In order to avoid deterioration, the analyzed crystals were embedded within a drop of viscous oil and freeze-cooled to 115 K. The structures were solved by direct methods and refined by full-matrix least squares on *F2* (Enraf-Nonius Kappa CCD).

**NMR Dimerization Experiments.** A concentrated stock solution (5 mM) of the complex was prepared by accurately weighing out the dried complex (6.0 mg) and dissolving it in an accurately measured volume of CD3CN (1.00 mL). The concentration dependence of the chemical shifts was studied at 296.9 ± 0.1 K. 10 – 50 L aliquots of the stock solution were added to an NMR tube initially containing 0.40 mL of CD3CN, and 50 L aliquots of CD3CN were added to an NMR tube initially containing 0.40 mL of the concentrated stock solution to obtain a wide concentration range. The NMR spectrum was recorded after several minutes of thermal equilibration time, following each addition. The dimerization constant was calculated based on the chemical shifts of the Hd and Hd’ protons2 using the Horman and Dreux method.3 Table 1 lists chemical shifts of these protons at different concentrations.

*Figure 1* Structure and proton assignment of [Ru(bpy2(dbneil)][PF6]2.

*Table 1* Chemical shifts of protons d and d’ at various concentrations in CD3CN at 296.9 ± 0.1 K.

| **Concentration (mM)** | **Hd (ppm)** | **Hd’ (ppm)** |
| --- | --- | --- |
| 5.173 | 8.631 | 8.657 |
| 4.598 | 8.644 | 8.668 |
| 4.138 | 8.658 | 8.681 |
| 3.762 | 8.671 | 8.693 |
| 3.449 | 8.681 | 8.703 |
| 3.183 | 8.692 | 8.713 |
| 2.956 | 8.703 | 8.823 |
| 2.759 | 8.714 | 8.732 |
| 2.586 | 8.724 | 8.742 |
| 2.434 | 8.735 | 8.751 |
| 2.299 | 8.750 | 8.750 |
| 2.586 | 8.711 | 8.730 |
| 2.414 | 8.722 | 8.740 |
| 2.217 | 8.737 | 8.753 |
| 1.990 | 8.766 | 8.766 |
| 1.724 | 8.784 | 8.784 |
| 1.411 | 8.821 | 8.821 |
| 1.035 | 8.879 | 8.879 |
| 0.575 | 8.986 | 8.966 |
| 0.470 | 9.031 | 8.997 |
| 0.361 | 9.077 | 9.034 |
| 0.246 | 9.137 | 9.084 |
| 0.126 | 9.203 | 9.139 |
| **0(calc)** | 9.365 | 9.278 |
| **∞(calc)** | 8.305 | 8.385 |
| **KD(calc)** | 780 M-1 | 715 M-1 |
| **KD(ave)a** | 750 ± 40 M-1 | |

*a* The error was estimated as the range of linearity of the graph (R2  0.998). This also includes the error in concentration.

**References.**

1. G. Gellerman, A. Rudi and Y. Kashman, *Tetrahedron*, 1994, **50**, 12959.
2. These protons were selected because they are clearly seen throughout the entire concentration range, and because they are at the middle part of the ligand so that their chemical shift is indicative of the extent of π-stacking.
3. I. Horman, B. Dreux, *Helv. Chim. Acta*, 1984, **67**, 754.
